# Supplementary material for: Farringtonite as an efficient catalyst for linear-chain α-olefin epoxidation with aqueous hydrogen peroxide
Source: Royal Society of Chemistry journal article supplement (doi:10.1039/d1nj01872h), 2021-01-01
Supplement: d1nj01872h1.pdf [file d1nj01872h1.pdf]

# Supporting Information

## **Farringtonite as an efficient catalyst for linear chain $\alpha$ -olefins epoxidation with aqueous hydrogen peroxide**

Xingyu Yang<sup>1</sup>, Xu Li\*<sup>1</sup>, and Jinxiang Dong\*<sup>1,2</sup>

1 Department of Chemical Product Engineering, College of Chemistry  
and Chemical Engineering, Taiyuan University of Technology,  
Taiyuan 030024, China

2 School of Chemical Engineering and Light Industry, Guangdong  
University of Technology, Guangzhou 510006, China

### 1.1 An attempt of adding new 30% H<sub>2</sub>O<sub>2</sub> to improve 1-octene conversion

According to the almost unchanged trend for 21 to 24 h in 2.2.5, the fresh 30% H<sub>2</sub>O<sub>2</sub> was added into the 1-octene epoxidation reaction at 21 h. The results are shown in Table S1. The conversion of 1-octene was 85.2% with the epoxide selectivity of 87.6% under optimal conditions. When a new equiv of H<sub>2</sub>O<sub>2</sub> was added at 21 h, the conversion of 1-octene increased from 85.2% to 90.9% after 24 h with almost constant selectivity. Further attempt of adding two equiv of H<sub>2</sub>O<sub>2</sub> was carried out. To our delight, a significant improvement in 1-octene conversion was observed, which achieved 95.6% conversion with epoxide selectivity of 87.9% after 24 h of reaction. However, when the equivalent of H<sub>2</sub>O<sub>2</sub> was increased to 3, a decrease to 92.7% in the conversion was observed compared with that of two equiv of H<sub>2</sub>O<sub>2</sub>, which indicates that an excess of H<sub>2</sub>O<sub>2</sub> is not effective to improve 1-octene conversion due to the difficulty of phase transfer in the catalytic system.

**Table S1** An attempt of adding new 30% H<sub>2</sub>O<sub>2</sub> to improve 1-octene conversion

| Entry | Conditions                                                                |                                                                           | The results on<br>1-octene epoxidation |                    |
|-------|---------------------------------------------------------------------------|---------------------------------------------------------------------------|----------------------------------------|--------------------|
|       | H <sub>2</sub> O <sub>2</sub> /1-octene molar ratio (equiv.) <sup>a</sup> | H <sub>2</sub> O <sub>2</sub> /1-octene molar ratio (equiv.) <sup>b</sup> | Conversion<br>(%)                      | Selectivity<br>(%) |
| 1     | 5                                                                         | 0                                                                         | 85.2                                   | 87.6               |
| 2     | 5                                                                         | 1                                                                         | 90.9                                   | 87.8               |
| 3     | 5                                                                         | 2                                                                         | 95.6                                   | 87.9               |
| 4     | 5                                                                         | 3                                                                         | 92.7                                   | 85.9               |

Reaction condition:

Entry 1: 70 °C, 21h, 1-octene (6.50 mmol), farringtonite (105.00 mg), acetonitrile (5.60 g).

Entry 2,3 and 4: 70 °C, 24 h, 1-octene (6.50 mmol), farringtonite (105.00 mg), acetonitrile (5.60 g).

The conversion was determined by GC and based on 1-octene.

a: Initial amount of H<sub>2</sub>O<sub>2</sub>

b: Amount of added fresh H<sub>2</sub>O<sub>2</sub> at 21h
